# Supplementary material for: Shifting communities after­­ typhoon damage on an upper mesophotic reef in Okinawa, Japan
Source: PeerJ. 2017 Aug 18;5:e3573. doi: 10.7717/peerj.3573 (PMC5564387; doi:10.7717/peerj.3573)
Supplement: Table S1 — Morpho-functional groups of observed Scleractinia operational taxonomic units at Ryugu, Okinawa, Japan, 2012–2015. [file peerj-05-3573-s002.xlsx]

## Sheet: Sheet1
Species name	Arborescent	Bushy	Plate-like	Columnar	Laminar & foliose	Unattached	Massive & submassive	Encrusting
Acropora echinata	0	1	0	0	0	0	0	0
Acropora sp. 1	1	1	0	0	0	0	0	0
Acropora sp. 2	0	1	1	0	0	0	0	0
Acropora sp. 3	0	1	0	0	0	0	0	0
Acropora sp. 4	0	1	1	0	0	0	0	0
Acropora sp. 5	0	1	0	0	0	0	0	0
Acropora sp. 6	0	1	0	0	0	0	0	0
Agaraciidae sp. 1	0	0	0	0	1	0	0	0
Astreopora sp. 1	0	0	0	0	0	0	1	1
Australomussa sp. 1	0	0	0	0	0	0	1	1
Caulastrea sp. 1	0	0	0	0	0	0	1	0
Ctenactis albitentaculata	0	0	0	0	0	1	0	0
Ctenactis crassa	0	0	0	0	0	1	0	0
Ctenactis echinata	0	0	0	0	0	1	0	0
Danafungia horrida	0	0	0	0	0	1	0	0
Danafungia scruposa	0	0	0	0	0	1	0	0
Echinophyllia orpheensis	0	0	0	0	0	0	1	0
Echinophyllia sp. 1	0	0	0	0	1	0	0	1
Euphyllia glabrescens	0	0	0	0	0	0	1	0
Dipsastraea sp. 1	0	0	0	0	0	0	1	0
Favites sp. 1	0	0	0	0	0	0	1	0
Favites sp. 2	0	0	0	0	0	0	1	1
Galaxea sp. 1	0	0	0	1	0	0	1	1
Galaxea sp. 2	0	0	0	0	0	0	1	1
Galaxea sp. 3	0	0	0	0	0	0	1	1
Goniastrea_sp1	0	0	0	0	0	0	1	0
Halomitra pileus	0	0	0	0	0	1	0	0
Herpolitha limax	0	0	0	0	0	1	0	0
Lithophyllon concinna	0	0	0	0	1	0	0	1
Lithophyllon repanda	0	0	0	0	1	0	0	1
Lobophyllia sp. 1	0	0	0	0	0	0	1	0
Merulina sp. 1	0	0	0	0	1	0	0	1
Merulinidae sp. 2	0	0	0	0	1	0	0	1
Millepora sp. 1	0	0	0	0	0	0	0	1
Montipora sp. 1	0	0	0	0	0	0	0	1
Montipora sp. 4	0	0	0	0	1	0	0	1
Montipora sp. 5	0	0	0	0	1	0	0	1
Montipora sp. 6	0	0	0	0	1	0	0	1
Montipora sp. 7	0	0	0	0	0	0	0	1
Mycedium elephantotus	0	0	0	0	1	0	0	1
Mycedium sp. 1	0	0	0	0	1	0	0	1
Oxypora lacera	0	0	0	0	1	0	0	1
Pachyseris foliosa	0	0	0	0	1	0	0	0
Pachyseris rugosa	0	0	1	1	1	0	0	0
Pachyseris speciosa	0	0	0	0	1	0	0	0
Pavona cactus	0	0	0	0	1	0	0	0
Pectinia sp. 1	0	0	0	0	1	0	0	1
Plerogyra sinuosa	0	0	0	0	0	0	1	0
Pleuractis granulosa	0	0	0	0	0	1	0	0
Pleuractis paumotensis	0	0	0	0	0	1	0	0
Porites sp. 1	0	1	0	0	0	0	0	0
Porites sp. 2	0	0	0	0	0	0	0	1
Sandalolitha robusta	0	0	0	0	0	1	0	0
Seriatopora hystrix	0	1	0	0	0	0	0	0
Stylophora pistillata	0	1	0	0	0	0	0	0
Turbinaria sp. 1	0	1	0	0	0	0	0	1
Unknown Fungiidae	0	0	0	0	0	1	0	0
